# Supplementary material for: Common chemotherapeutic agents modulate fatty acid distribution in human hepatocellular carcinoma and colorectal cancer cells
Source: PubMed Central journal article supplement — Bioimpacts. 2017 Feb 8;7(1):31–9. doi: 10.15171/bi.2017.05 (PMC5439387; doi:10.15171/bi.2017.05), 2017-02-08
Supplement: bi-7-31-s001.pdf [file bi-7-31-s001.pdf]

## Supplementary data

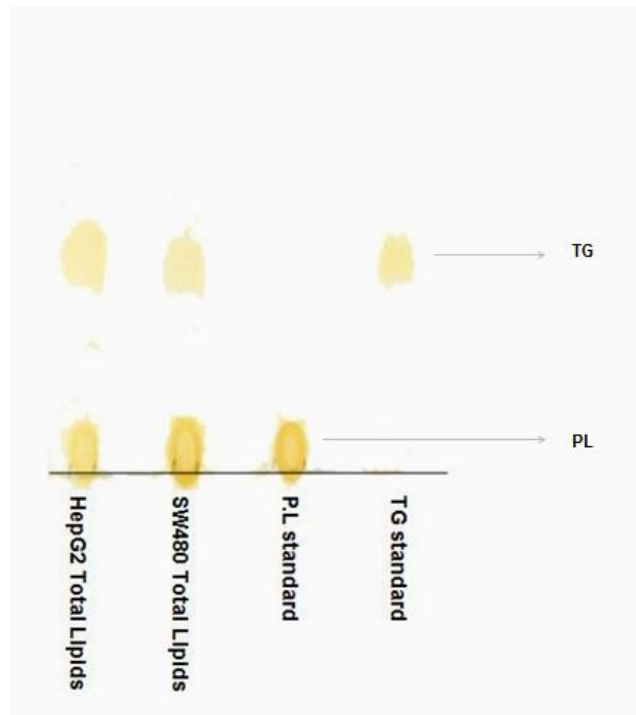

**Fig. S1.** Fractionation of phospholipid (PL) and triglycerides (TG) from HepG2 and SW480 total lipid extracts by thin layer chromatography technique. TLC plates were placed in a TLC tank containing a mobile phase (hexane/diethyl ether/acetic acid) for 90 minutes and targeted fractions were visualized by iodine crystals. Identified fractions are labeled according to the standards rate of flow.

HepG2

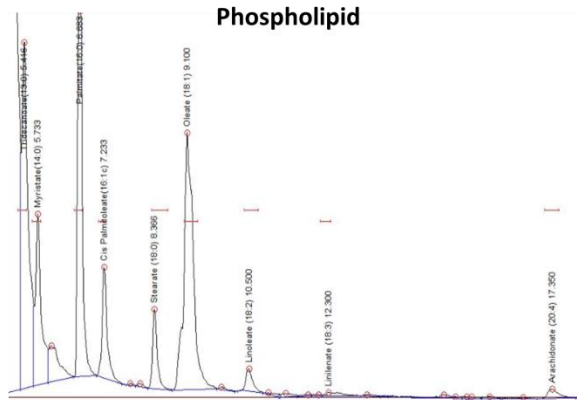

Triglyceride

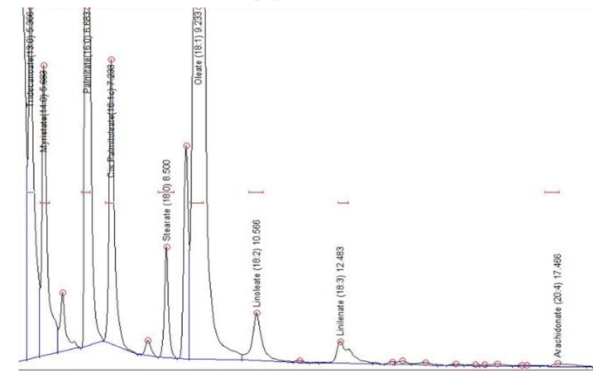

SW480

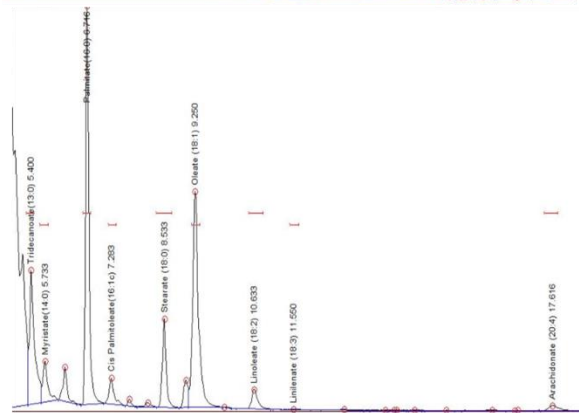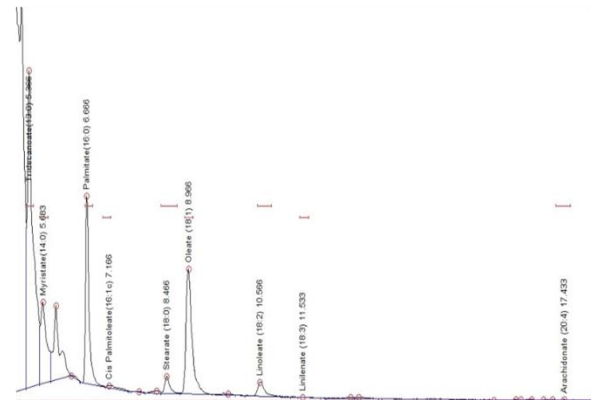

**Fig. S2.** Representative gas-liquid chromatograms of fatty acids from phospholipid (PL) and triglyceride (TG) fractions from HepG2 and SW480 cells.

HepG2 Cell line

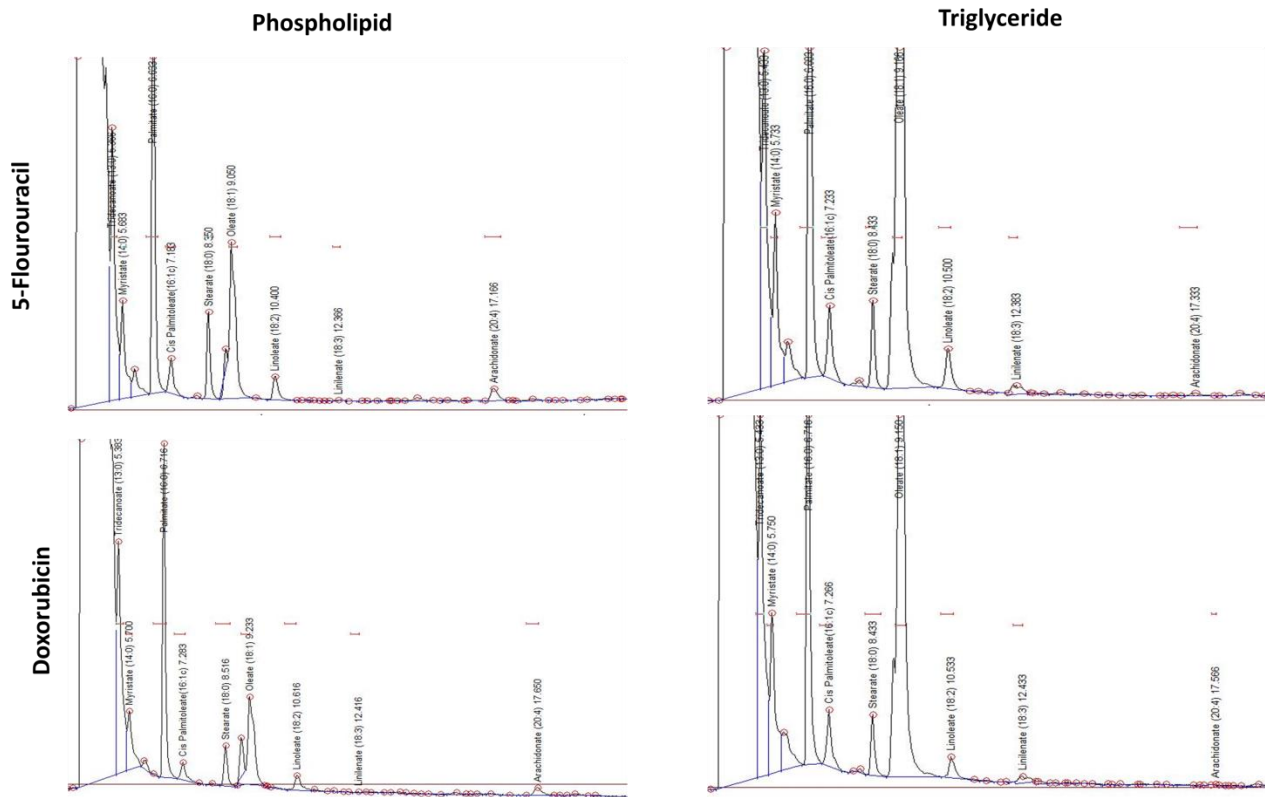

**Fig. S3.** Representative gas-liquid chromatograms of fatty acids from phospholipid (PL) and triglyceride (TG) fractions from 5-FU and/or dox treated HepG2 cells.

SW480 Cell line

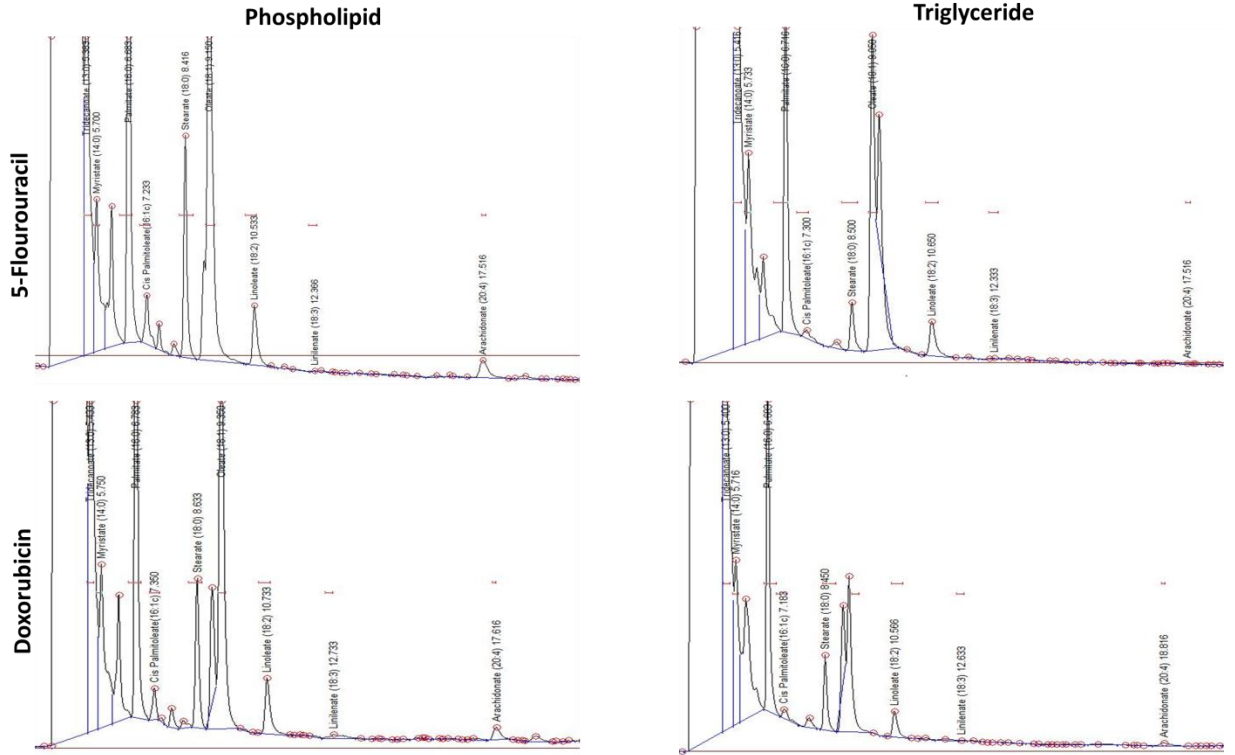

**Fig. S4.** Representative gas-liquid chromatograms of fatty acids from phospholipid (PL) and triglyceride (TG) fractions from 5-FU and/or dox treated SW480 cells.
